# Supplementary material for: Multiplexed single-cell in situ RNA analysis by reiterative hybridization
Source: Royal Society of Chemistry journal article supplement (doi:10.1039/c5ay00500k), 2015-01-01
Supplement: c5ay00500k1.pdf [file c5ay00500k1.pdf]

Supporting Information

## **Multiplexed Single-Cell In Situ RNA Analysis by Reiterative Hybridization**

Lu Xiao, Jia Guo\*

Department of Chemistry and Biochemistry & Biodesign Institute, Arizona State  
University, Tempe, Arizona 85287, United States

\*To whom correspondence should be addressed.

Tel: (+1) 480-727-2096; Fax: (+1) 480-965-2747; Email: [jiaguo@asu.edu](mailto:jiaguo@asu.edu).

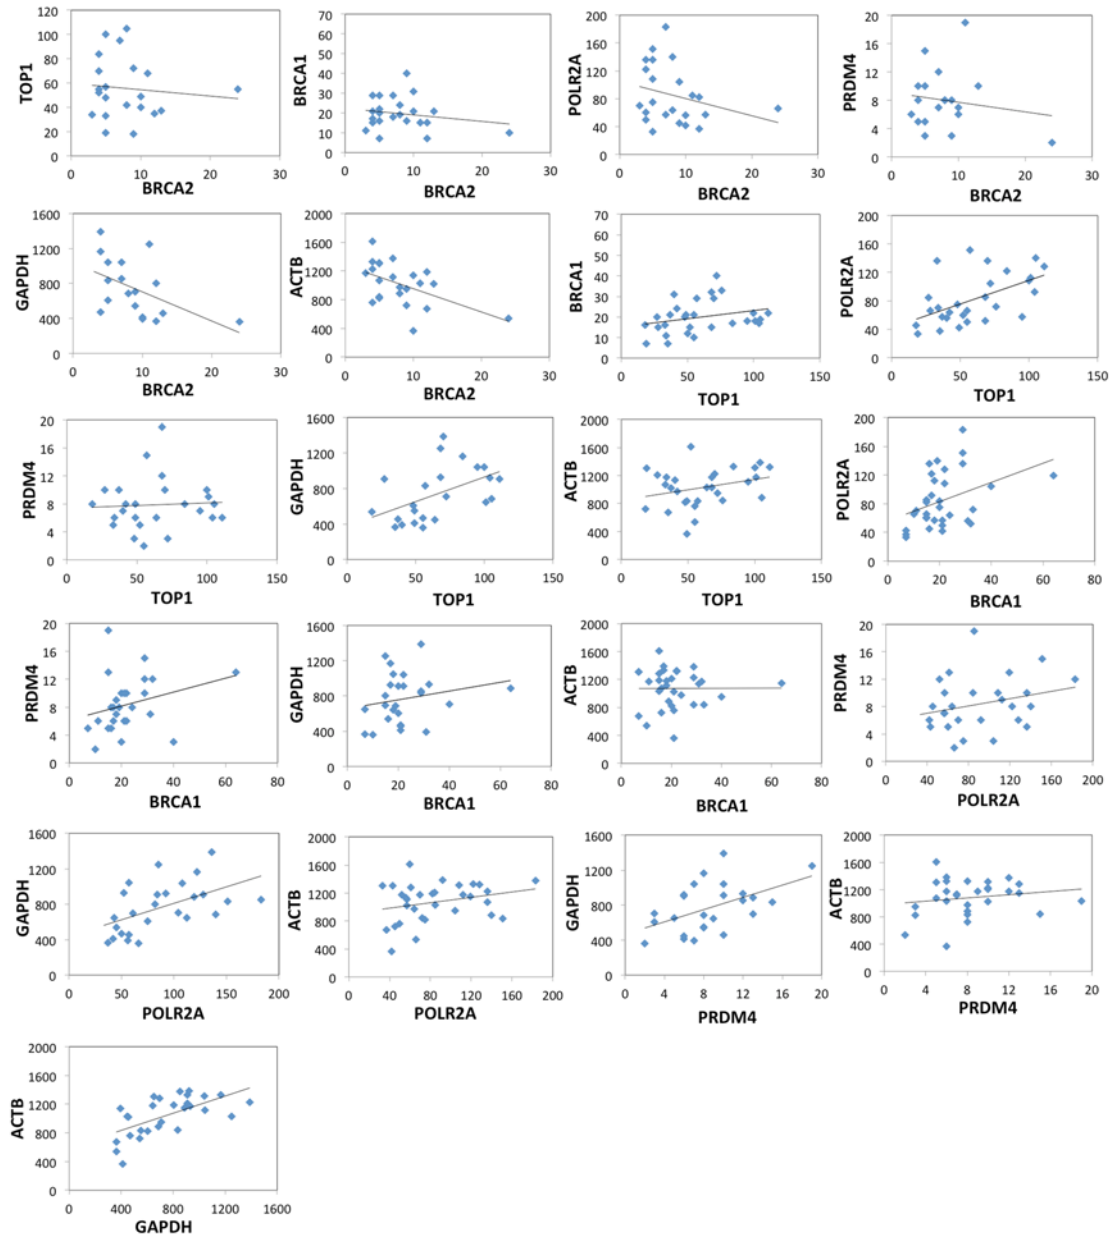

Fig. S1. Raw expression correlation data of each gene pair. Each spot corresponds to one cell with transcripts copy numbers in the x and y axes.
